# Supplementary material for: CALR-TLR4 Complex Inhibits Non-Small Cell Lung Cancer Progression by Regulating the Migration and Maturation of Dendritic Cells
Source: PubMed Central journal article supplement (PMC8517398; doi:10.3389/fonc.2021.743050), 2021-10-01

Fig. S1

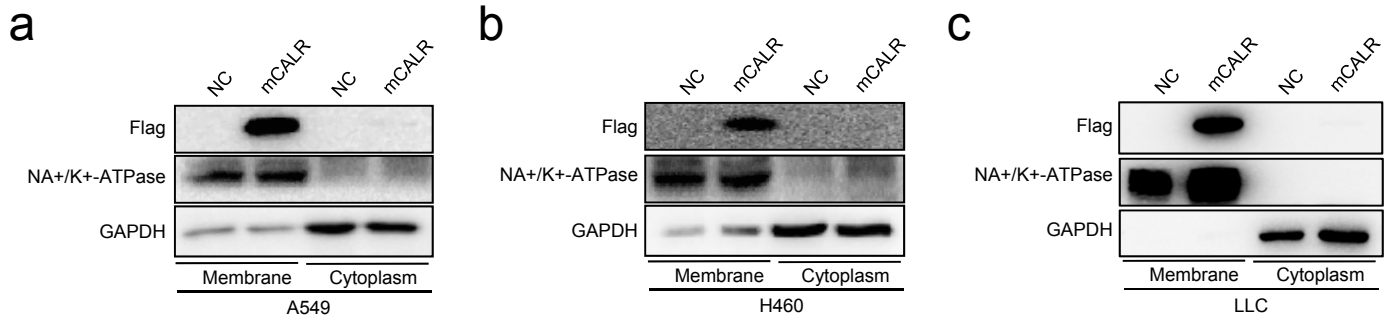

Fig. S2

a

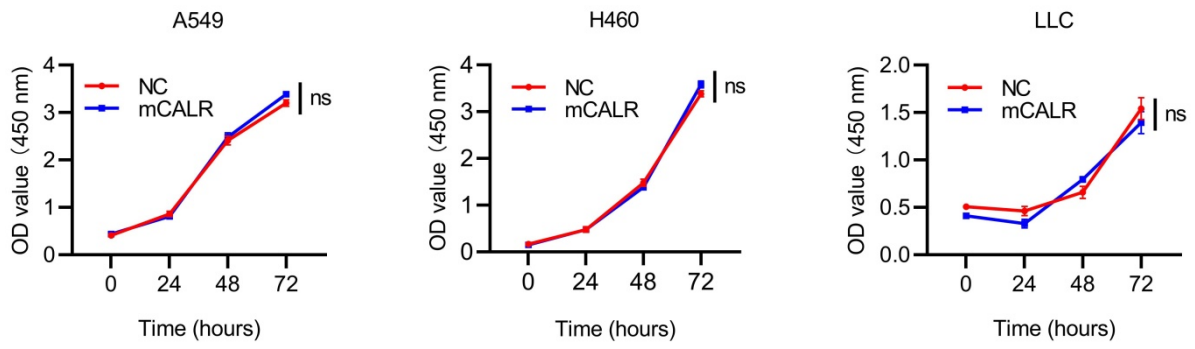

b

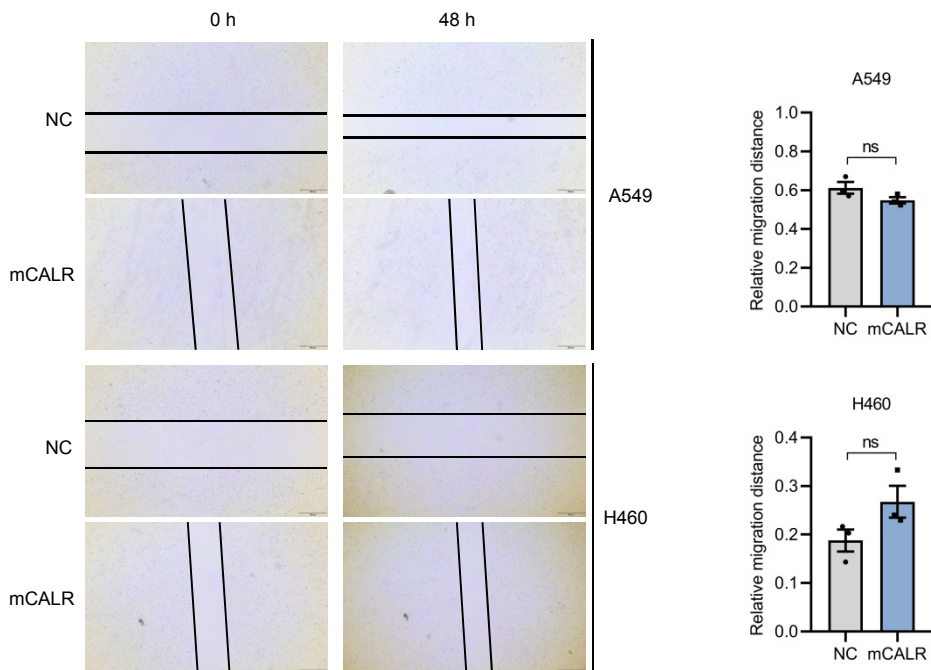

Supplement: DataSheet_1.pdf [file DataSheet_1.pdf]
